RESEARCH ARTICLE

# Predicting Effects of Ocean Acidification and Warming on Algae Lacking Carbon Concentrating Mechanisms

Janet E. Kübler\*, Steven R. Dudgeon

Department of Biology, California State University, Northridge, California, United States of America

\* [janet.kubler@csun.edu](mailto:janet.kubler@csun.edu)

## Abstract

Seaweeds that lack carbon-concentrating mechanisms are potentially inorganic carbon-limited under current air equilibrium conditions. To estimate effects of increased atmospheric carbon dioxide concentration and ocean acidification on photosynthetic rates, we modeled rates of photosynthesis in response to  $p\text{CO}_2$ , temperature, and their interaction under limiting and saturating photon flux densities. We synthesized the available data for photosynthetic responses of red seaweeds lacking carbon-concentrating mechanisms to light and temperature. The model was parameterized with published data and known carbonate system dynamics. The model predicts that direction and magnitude of response to  $p\text{CO}_2$  and temperature, depend on photon flux density. At sub-saturating light intensities, photosynthetic rates are predicted to be low and respond positively to increasing  $p\text{CO}_2$ , and negatively to increasing temperature. Consequently,  $p\text{CO}_2$  and temperature are predicted to interact antagonistically to influence photosynthetic rates at low PFD. The model predicts that  $p\text{CO}_2$  will have a much larger effect than temperature at sub-saturating light intensities. However, photosynthetic rates under low light will not increase proportionately as  $p\text{CO}_2$  in seawater continues to rise. In the range of light saturation ( $I_k$ ), both  $\text{CO}_2$  and temperature have positive effects on photosynthetic rate and correspondingly strong predicted synergistic effects. At saturating light intensities, the response of photosynthetic rates to increasing  $p\text{CO}_2$  approaches linearity, but the model also predicts increased importance of thermal over  $p\text{CO}_2$  effects, with effects acting additively. Increasing boundary layer thickness decreased the effect of added  $p\text{CO}_2$  and, for very thick boundary layers, overwhelmed the effect of temperature on photosynthetic rates. The maximum photosynthetic rates of strictly  $\text{CO}_2$ -using algae are low, so even large percentage increases in rates with climate change will not contribute much to changing primary production in the habitats where they commonly live.

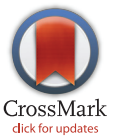

## OPEN ACCESS

**Citation:** Kübler JE, Dudgeon SR (2015) Predicting Effects of Ocean Acidification and Warming on Algae Lacking Carbon Concentrating Mechanisms. PLoS ONE 10(7): e0132806. doi:10.1371/journal.pone.0132806

**Editor:** Wei-Chun Chin, University of California, Merced, UNITED STATES

**Received:** January 29, 2015

**Accepted:** June 19, 2015

**Published:** July 14, 2015

**Copyright:** © 2015 Kübler, Dudgeon. This is an open access article distributed under the terms of the [Creative Commons Attribution License](https://creativecommons.org/licenses/by/4.0/), which permits unrestricted use, distribution, and reproduction in any medium, provided the original author and source are credited.

**Data Availability Statement:** All relevant data are within the paper and its Supporting Information files.

**Funding:** This work was supported by the National Science Foundation Ocean Sciences Program, OCE-1316198 to JE Kübler and SR Dudgeon.

**Competing Interests:** The authors have declared that no competing interests exist.

## Introduction

Continued absorption of anthropogenic emissions of CO<sub>2</sub> from burning fossil fuels, into seawater will inevitably lead to further declines in oceanic pH with predictable consequences for oceanic chemistry [1,2]. Changing ocean chemistry is expected to shift ratios of resources as well as environmental conditions, thereby favoring some groups of organisms at the expense of others [3–6]. Much attention has focused on calcifying organisms that are predicted to be vulnerable to ocean acidification as a result of lower saturation states of calcium carbonate species as reviewed in [7–9]. Non-calcifying phototrophs (e.g., macroalgae and seagrasses) are predicted to benefit in terms of growth, if not always in terms of photosynthetic rate, from ocean acidification (OA) due to the enhanced availability of dissolved CO<sub>2</sub> in the ocean.

In contrast to studies of OA on putatively vulnerable taxa, there has been less effort directed towards questions about the magnitudes of the effect on putative beneficiaries of OA. There are many important questions about these organisms in need of resolution to better predict the consequences of climate change to oceanic ecosystems, such as, “will, and if so, by how much will algal productivity be enhanced in acidified coastal water?”, “will productivity be determined by changing *p*CO<sub>2</sub> or temperature?”, or “how will the mode of inorganic carbon acquisition interact with other determinants of productivity as *p*CO<sub>2</sub> increases?”.

Recent comprehensive meta-analyses [6,7,10] reviewing the effects of OA on marine organisms, highlight, the paucity of investigation relative to other groups, and interesting patterns of response of non-calcifying algae. Studies of fleshy macroalgae thus far, generally show significantly enhanced growth under OA, yet without significant enhancement of photosynthesis in response to moderately elevated *p*CO<sub>2</sub>. The effect of sampling few fleshy macroalgae coupled with inattention to the species’ mechanisms of inorganic carbon uptake may mask variation present in the magnitude of effects OA has on macroalgal physiology, productivity and growth.

Whereas all green and brown macroalgae use both HCO<sub>3</sub><sup>-</sup> and CO<sub>2</sub> sources of inorganic carbon for photosynthesis, not all red algae can take up HCO<sub>3</sub><sup>-</sup> directly. Approximately 35% of all red algal species tested use only dissolved CO<sub>2</sub> for photosynthesis [4,11]. These species are characteristic of light-limited environments such as beneath overhanging rock walls in intertidal or subtidal habitats, especially in temperate and sub-arctic environments [12,13]. Non bicarbonate using red algae are found in very high abundance (> 60% of species) in low light environments around Tasmania, Australia [14]. Demand for dissolved inorganic carbon is less when PFD is low.

Photosynthesis of CO<sub>2</sub>-using red macroalgae is potentially carbon-limited at present oceanic dissolved *p*CO<sub>2</sub> and is a hypothesized link to their occurrence in low light habitats [15,16]. Therefore, a straightforward prediction of the effects of ocean acidification is an increase in productivity and growth of strict CO<sub>2</sub>-using algae. Greater inorganic carbon availability could lead to ranges extending into new, higher light intensity, habitats. A prior study of the CO<sub>2</sub>-using red alga, *Lomentaria articulata*, showed enhanced growth with increased *p*CO<sub>2</sub> [16] supporting that prediction, but there are few other well studied CO<sub>2</sub>-using marine red algae. Critical gaps remain with respect to predicting the effects of climate change on macroalgal production. Despite extensive knowledge of the effects of temperature on macroalgal photosynthesis [17–20] the combined effects of increasing *p*CO<sub>2</sub> and temperature are less well known. Macroalgae with CCMs tend to have positive additive or synergistic effects of temperature and OA [21, 22]. A key question arising from projections of climate change is whether the known responses to temperature change and to increased inorganic carbon supply are additive or synergistic. Light supply also interacts with both temperature [20] and inorganic carbon uptake [23, 24]. We expected light supply to interact with climate change in algal productivity, possibly modulating the interaction between OA and temperature effects.

Our ability to predict the effects of climate change on algal productivity and growth are contingent upon our understanding of how changing environments affect algal physiological responses. In this context, we have developed a model specific to CO<sub>2</sub>-using red macroalgae. The model predicts effects of increased *p*CO<sub>2</sub> (OA) and temperature on photosynthetic production at different light intensities. Comparing theoretical predictions with observations, as more data becomes available, will provide a test of synergies in the combined effects of light intensity with increasing acidification and temperature in the oceans on productivity of CO<sub>2</sub>-using algae. The model is parameterized using known temperature-dependent diffusivities of the different inorganic carbon species in seawater of given characteristics (salinity, pressure, viscosity, pH, total alkalinity), and photosynthetic responses of CO<sub>2</sub>-using marine red macroalgae to variations in light and temperature.

This model represents a starting point for choosing the combinations of multiple environmental factors and corresponding habitats that may be of special interest as ocean acidification continues. The parameterizing studies were primarily done as single stressor dose response studies rather than multi-stressor factorial manipulations and we are able to leverage areas of overlap. Our synthesis of the available data allows for the detection of habitats where physiological and ecological studies can be focused to maximize efficiency of further work. For example, if ocean acidification will alleviate other limitations to the range of the macrophytes in question, where can we predict their ranges to expand?

## Materials and Methods

### The Model

Our model of photosynthetic production uses the Hill-Whittingham (1955) equation, which is the appropriate model for aquatic systems where diffusive uptake of inorganic carbon can be limiting [25–27]. For red macroalgae that take up only CO<sub>2</sub>, this is the case regardless of the presence of external carbonic anhydrase (CA) in the cell wall. CA only affects the rate of equilibration between CO<sub>2</sub> and HCO<sub>3</sub><sup>-</sup> [28] and ultimately CO<sub>2</sub> crosses the plasmalemma by diffusion.

Photosynthetic rate is modeled as a hyperbolic function of CO<sub>2</sub> concentration and permeability in the following equation:

$$V_o = 0.5 * \left\{ \left( P_u * K_{1/2} + P_u * S + V_{max} \right) - \left[ \left( P_u * K_{1/2} + P_u + V_{max} \right)^2 - (4 * P_u * S * V_{max}) \right]^{1/2} \right\} \quad (1)$$

where;

$V_o$  = Net photosynthetic rate in  $\mu\text{mol C-fixed} \cdot \text{m}^{-2} \cdot \text{s}^{-1}$

$P_u$  = permeability coefficient in  $\text{m} \cdot \text{s}^{-1}$ ; the ratio of the temperature-dependent diffusion of CO<sub>2</sub> and pathlength from outside the cell to the plastid

$K_{1/2}$  = half-saturation constant of photosynthesis at specified conditions of light and temperature; in  $\mu\text{mol} \cdot \text{m}^{-3}$

$S$  = Substrate concentration in  $\mu\text{mol} \cdot \text{m}^{-3}$ ; the dynamic flux expressed as the difference in dissolved CO<sub>2</sub> outside ( $C_{ext}$ ) and inside ( $C_{int}$ ) the cell

$V_{max}$  = Maximum net photosynthetic rate at specified conditions of light and temperature in  $\mu\text{mol C-fixed} \cdot \text{m}^{-2} \cdot \text{s}^{-1}$

Data obtained from the model reflect acclimation to steady state conditions of light, temperature and pH/carbon balance. We assume no adaptive evolution on the timescale of the model.

## Model Parameterization

Parameters of this equation are influenced by light availability, temperature, hydrodynamics and/or nutrient concentration. Some relationships are the direct effect of water chemistry, for example, the positive effect of temperature on diffusion rate. Other parameters, such as the  $\text{CO}_2$  concentration gradient between the seawater medium and the location of carbon fixation, depend on boundary layer characteristics and  $P_{\text{max}}$  under the prevailing conditions. Thus we have a basis to explore the potentially interactive effects of light,  $\text{CO}_2$  availability and temperature on algal productivity, through the Hill-Whittingham equation.

The half-saturation constant ( $K_{1/2}$ ) of photosynthesis of strict  $\text{CO}_2$ -using red algae is light-dependent [12]. We assumed a linear dependence of  $K_{1/2}$  on light intensity because the functional relationship of the light-dependence of  $K_{1/2}$  between sub-saturating and saturating light intensities has not been resolved.

It is well established that photosynthetic rates of macroalgae are affected by temperature and the availabilities of light and dissolved inorganic carbon (DIC) [18,23,29,30]. We used the averages of photosynthetic rate parameters (per unit thallus area) at both sub-saturating and saturating light intensities and temperatures ranging from 5 to 30°C from published studies of known  $\text{CO}_2$ -using red macroalgal species (e.g., genera including *Lomentaria*, *Delesseria*, *Plocamium*) to parameterize photosynthetic performance (i.e.,  $V_{\text{max}}$ ) of the model [11,12,18], [see Supporting Information, S1 Table for details]. The mass-specific rates of photosynthesis of *Lomentaria* species reported in [18] were converted to area-specific rates using the biomass to area conversion factor for *Lomentaria* provided in [12].

We modeled a linear increase of photosynthesis (due to presumed declining photorespiration) of 10% between the lowest modeled  $p\text{CO}_2$  and the highest modeled  $p\text{CO}_2$  (reduced photorespiration). At normoxia and  $p\text{CO}_2$  of approximately 380  $\mu\text{atm}$  in the gas phase, photosynthesis of  $\text{CO}_2$ -using red macroalgae is reduced by 5–6% by photorespiration [31–35]. As increasing  $\text{CO}_2$  at constant  $p\text{O}_2$  will reduce the mole fraction ratio of  $\text{O}_2:\text{CO}_2$  at the site of carbon fixation by Ribulose-1,5-bisphosphate-carboxylase (RUBISCO), OA is expected to reduce photorespiratory losses of  $\text{CO}_2$ -using red algae.

The flux of dissolved  $\text{CO}_2$  supplied to the site of RUBISCO is itself influenced by temperature both directly and indirectly. The direct effects of temperature on  $\text{CO}_2$  flux include its solubility and diffusivity in seawater [36,37]. At a given seawater pH,  $p\text{CO}_2$  decreases, but diffusivity of  $\text{CO}_2$  increases, with increasing temperature. These two parameters govern the external concentration of dissolved  $\text{CO}_2$  supplied to a cell on the thallus surface. Values for the concentrations and diffusivities of DIC species at 5°C intervals from 5 to 30°C were provided by  $\text{CO}_2\text{Calc}$  [36] and [37], respectively. Constants for use in calculating carbonate parameters were those of [38] based on the total pH scale. The formulation by [39] was used for the dissociation of  $\text{KHSO}_4$  to estimate carbonate parameters.

An indirect effect of temperature on  $\text{CO}_2$  flux is internal  $\text{CO}_2$  dynamics caused by temperature-dependent rates of metabolism [12]. The boundary conditions for internal  $\text{CO}_2$  concentration were established in the following way. Maximum internal  $\text{CO}_2$  was assumed to occur in darkness and was taken as the value in equilibrium with  $\text{CO}_2$  in external seawater. Minimum internal  $\text{CO}_2$  was assumed to occur under light saturation and was taken as the steady-state equilibrium corresponding to the respiration rate at a given temperature. At sub-saturating light intensities, a linear relationship of  $C_{\text{int}}$ -depletion with increasing light intensity was modeled between these boundary conditions corresponding to the linear rate of carbon-fixation by photosynthesis in the light-limited portion of the curve. Together, these direct and indirect temperature-dependent effects determine the flux to, and concentration of,  $\text{CO}_2$  substrate for RUBISCO.

In addition to modeling photosynthetic rate, we estimated values for isotopic composition of carbon ( $\delta^{13}\text{C}$ ) and discrimination against  $^{13}\text{C}$  ( $\Delta$ ) as an indicator of the physiological state of photosynthetic metabolism in response to OA and warming. At each seawater pH simulated, the mole fractions of dissolved  $\text{CO}_2$  and  $\text{HCO}_3^-/\text{CO}_3^{2-}$  of total inorganic carbon were calculated. These values were multiplied by the carbon isotopic fractionation of dissolved  $\text{CO}_2$  with respect to dissolved  $\text{HCO}_3^-$  in seawater at each temperature calculated using the temperature-dependent fractionation parameters for the carbonate system provided in [40]. These calculated values served as the isotopic composition value of the source seawater for calculating predicted values of  $\delta^{13}\text{C}$  of the plant using the formula [41]:

$$\delta^{13}\text{C}_{\text{org}} = \frac{\delta^{13}\text{C}_{\text{CO}_2} - \alpha_{\text{org}} + 1}{\alpha_{\text{org}}} \quad (2)$$

where,  $\delta^{13}\text{C}_{\text{org}}$  = carbon isotopic composition of the plant organic biomass

$\delta^{13}\text{CO}_2$  = carbon isotopic composition of dissolved  $\text{CO}_2$  in seawater of a given temperature

$\alpha_{\text{org}}$  = overall fractionation of  $^{13}\text{C}$  in dissolved  $\text{CO}_2$

We modeled the overall fractionation of  $^{13}\text{C}$  in dissolved  $\text{CO}_2$  ( $\alpha_{\text{org}}$ ) due to diffusion in seawater ( $\alpha_d = 1.0007$ ) and carboxylation by RUBISCO ( $\alpha_c = 1.029$ ) following the analysis by [41]:

$$\alpha_{\text{org}} = \alpha_d * \left( \frac{(C_b - C_c)}{C_b} \right) + \alpha_c * \left( \frac{C_c}{C_b} \right) \quad (3)$$

where,  $C_b = [\text{CO}_2]$  in the bulk medium,

$C_c = [\text{CO}_2]$  internally at the site of RUBISCO

These carbon availability parameters reflect the weighting of fractionation due to diffusion in seawater and the activity of RUBISCO in the overall effect of the fractionation parameter. Possible values of  $\alpha_{\text{org}}$  range from 1.0007 (diffusion limits any internal accumulation of  $\text{CO}_2$  precluding discrimination by RUBISCO) to 1.029 (fractionation solely due to discrimination by RUBISCO). We model these relative weights as a function of light availability (Table 1). Support for the chosen values is provided by data of [15] showing that in low-light  $\text{CO}_2$ -using red algae, 80–85% of the limitation of the rate of photosynthesis can be attributed to carboxylation. Under light-limitation, ample  $\text{CO}_2$  is available and, thus, RUBISCO carboxylation primarily determines  $\alpha_{\text{org}}$ . Under high light, diffusion of  $\text{CO}_2$  may limit photosynthesis and fractionation is increasingly influenced by the component due to diffusion.

The discrimination against  $^{13}\text{C}$  ( $\Delta$ ) was estimated for each  $\text{CO}_2$ , temperature and light level simulated from the formula in [41] using the light-dependent weightings of fractionation

**Table 1. Weighting coefficients of fractionation of  $^{13}\text{C}$  dissolved in  $\text{CO}_2$  due to diffusion ( $w_{\text{ad}}$ ) in seawater and carboxylation by RUBISCO ( $w_{\text{ac}}$ ) as a function of light intensity (PPFD).**

| PPFD | $w_{\text{ad}}$ | $w_{\text{ac}}$ |
|------|-----------------|-----------------|
| 10   | 0.02            | 0.98            |
| 35   | 0.07            | 0.93            |
| 50   | 0.01            | 0.90            |
| 75   | 0.15            | 0.85            |
| 100  | 0.20            | 0.80            |
| 400  | 0.30            | 0.70            |

PPFD measured in  $\mu\text{mol photons m}^{-2} \text{s}^{-1}$

doi:10.1371/journal.pone.0132806.t001

above to estimate  $\alpha_{org}$ :

$$\Delta = \frac{\delta^{13}C_{CO_2} - \delta^{13}C_{org}}{1 + \delta^{13}C_{org}} = \alpha_{org} - 1 \quad (4)$$

Comparisons among  $\Delta$  values obtained from future experiments with those of the modeled curve will elucidate whether those differences could be attributable to carbon-limitation at a given  $pCO_2$ , temperature and light intensity.

## Model Evaluation

The model varies parameters related to photosynthetic characteristics (e.g.,  $K_{1/2}$  and  $V_{max}$ ) and environmental conditions that determine dissolved  $CO_2$  concentration and photosynthetic capacity. Our focus was on modeling the individual and combined effects of OA and increased temperature on photosynthetic rates and how this relationship changes with light intensity. Photosynthetic performance was modeled for nine seawater pH values (7.73, 7.76, 7.80, 7.85, 7.88, 7.91, 7.95, 8.07 and 8.10) at each of six different seawater temperatures (5, 10, 15, 20, 25, 30°C). Photosynthetic rate in each of these 54 combinations of seawater pH and temperature was estimated in simulations at six light intensities (10, 35, 50, 75, 100, 400  $\mu\text{mol photons} \cdot \text{m}^{-2} \cdot \text{s}^{-1}$ ).

Other environmental and photosynthesis model parameters were held constant across all simulations. The physical and chemical seawater properties input as constants in  $CO_2\text{Calc}$  assumed a shallow near surface habitat characteristic of  $CO_2$ -using red macroalgae: salinity = 32‰; pressure = 20 dbars; and Total Alkalinity (TA) = 2200  $\mu\text{mol/kg}$  seawater. We also assumed a well-mixed flow environment with the minimum expected pathlength of 20  $\mu\text{m}$  for diffusive uptake of dissolved  $CO_2$  [15,42–44]. A minimal diffusive boundary layer for model results is consistent with all results taken from the literature, which were measured under well-mixed conditions. We additionally explored the effect of increasing boundary layer thickness over a order of magnitude, from 20 through 200  $\mu\text{m}$ , on the principal model outcomes (described in [S1 Appendix](#)).

## Analysis of Model Simulations

Modeled rates of photosynthesis at each  $pCO_2$  and temperature combination were analyzed using polynomial regression, which was most appropriate because of the well-known curvilinear response of the photosynthesis-temperature relationship over the range of simulated temperatures [17]. A separate regression analysis was done at each simulated light intensity. The aim of the regressions was to estimate standardized regression coefficients for linear and quadratic terms for  $CO_2$  and temperature and their interaction. These standardized coefficients were used to infer the relative magnitudes of effect on photosynthetic production caused by variation in  $CO_2$  and temperature. A total of 13 models that varied in the number and combination of predictor variables (i.e., presence or absence of quadratic and/or linear combinations of predictor variables) were evaluated at each light intensity. The best fit models at each light level were determined from corrected AIC values and their respective weights and relative likelihoods computed. Standardized regression coefficients were estimated by model averaging with unconditional standard errors obtained from the weights of all 13 models using the AICcmodavg (version 1.35, [45]) package in R [46]. The model averaging and multi-model inference approach of [47] employed here is described in [S2 Appendix](#).

## Results

Modeled rates of photosynthesis varied in response to changing  $pCO_2$ , changing temperature, and with the interaction of the two. The direction and magnitude of the predicted response to



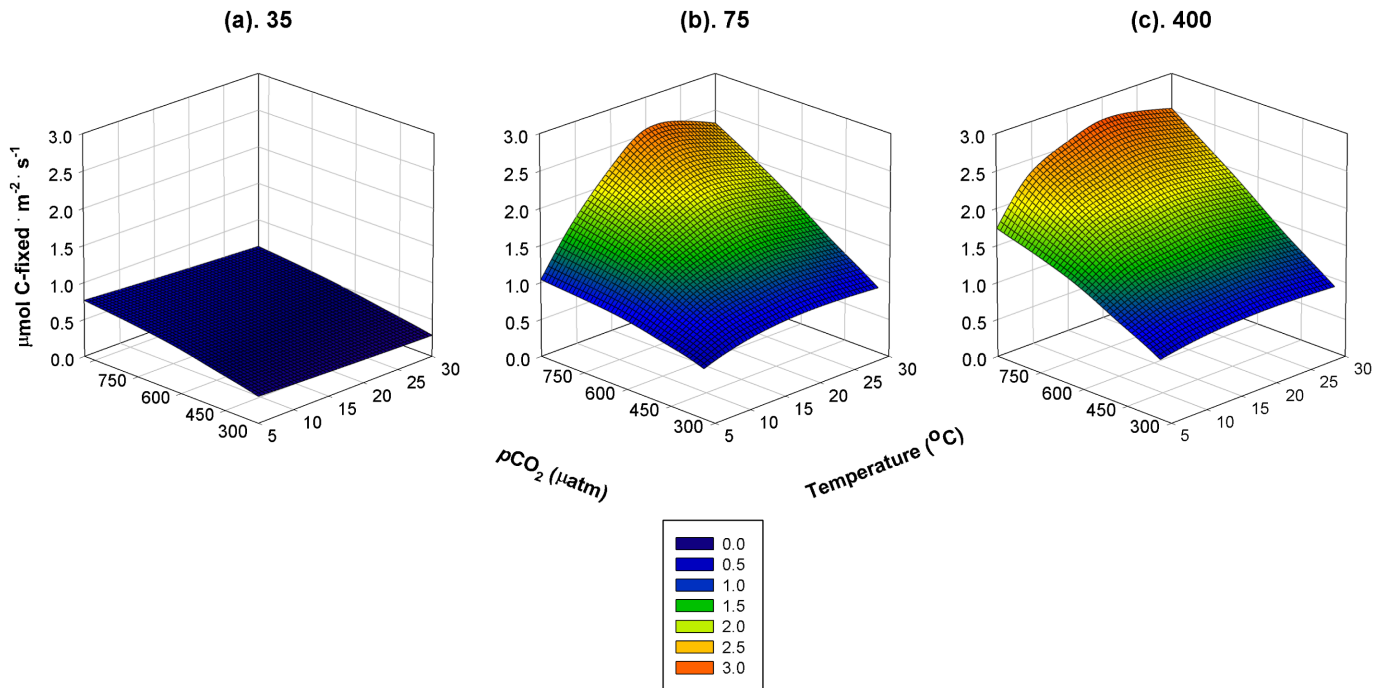

**Fig 1. Modeled rates of net photosynthesis as functions of predicted response to  $p\text{CO}_2$  and known response to temperature at sub-saturating ( $35\mu\text{mol photons} \cdot \text{m}^{-2} \cdot \text{s}^{-1}$ ), approximately  $I_k$  ( $75\mu\text{mol photons} \cdot \text{m}^{-2} \cdot \text{s}^{-1}$ ), and saturating ( $400\mu\text{mol photons} \cdot \text{m}^{-2} \cdot \text{s}^{-1}$ ) saturating photon flux densities. Response surface fit using polynomial regression.**

doi:10.1371/journal.pone.0132806.g001

$\text{CO}_2$  and temperature, however, changed with light intensity (Fig 1). At sub-saturating light intensities, photosynthetic rates are predicted to be low and respond positively to increasing  $p\text{CO}_2$ , and negatively to increasing temperature (Fig 1A). Consequently,  $\text{CO}_2$  and temperature interacted antagonistically to influence photosynthetic rates. Standardized regression coefficients at low light intensities predict that  $\text{CO}_2$  should have a much larger effect than temperature in both linear and quadratic components (Fig 2). Photosynthetic rates should be most responsive to  $p\text{CO}_2$  under sub-saturating light among all of the combinations of light, temperature and  $\text{CO}_2$  simulated. The large (in absolute value) predicted negative quadratic effect of  $\text{CO}_2$  under low light reflects the expectation that photosynthetic rates will not increase proportionately as  $p\text{CO}_2$  in seawater continues to rise (Fig 2B). This negative quadratic term approaches 0, and the linear coefficient increases, for  $\text{CO}_2$  as light intensity increases to saturating values indicating a reduced curvature and greater linearity of the response of photosynthetic rates to increasing  $p\text{CO}_2$  (cf.  $\text{CO}_2$  in Fig 2A and 2B).

In the vicinity of  $I_k$  (here,  $\sim 75\mu\text{mol photons} \cdot \text{m}^{-2} \cdot \text{s}^{-1}$ ), the model predicts a switch in the relative importance of  $\text{CO}_2$  and temperature on photosynthetic rates. Linear and quadratic standardized coefficients for  $\text{CO}_2$  decline to absolute values  $< 0.5$ , whereas those for temperature increase in absolute magnitude to  $\geq 1.25$  (Fig 2).  $\text{CO}_2$  and temperature coincide in their effect on photosynthetic rates (positive linear and negative quadratic components) and this interaction results in strong predicted synergistic effects on rates especially at high  $p\text{CO}_2$  and moderate temperatures (Fig 1B, i.e.,  $15\text{--}25^\circ\text{C}$ ). At  $p\text{CO}_2 > 700\text{ uatm}$ , photosynthetic rates are expected to double and be markedly responsive to temperature showing the characteristic, asymmetrical, hump-shaped curve with a maximum at  $15\text{--}20^\circ\text{C}$ . At historical and current  $p\text{CO}_2$ , the sensitivity to temperature of photosynthetic rates of  $\text{CO}_2$ -using macroalgae is less.

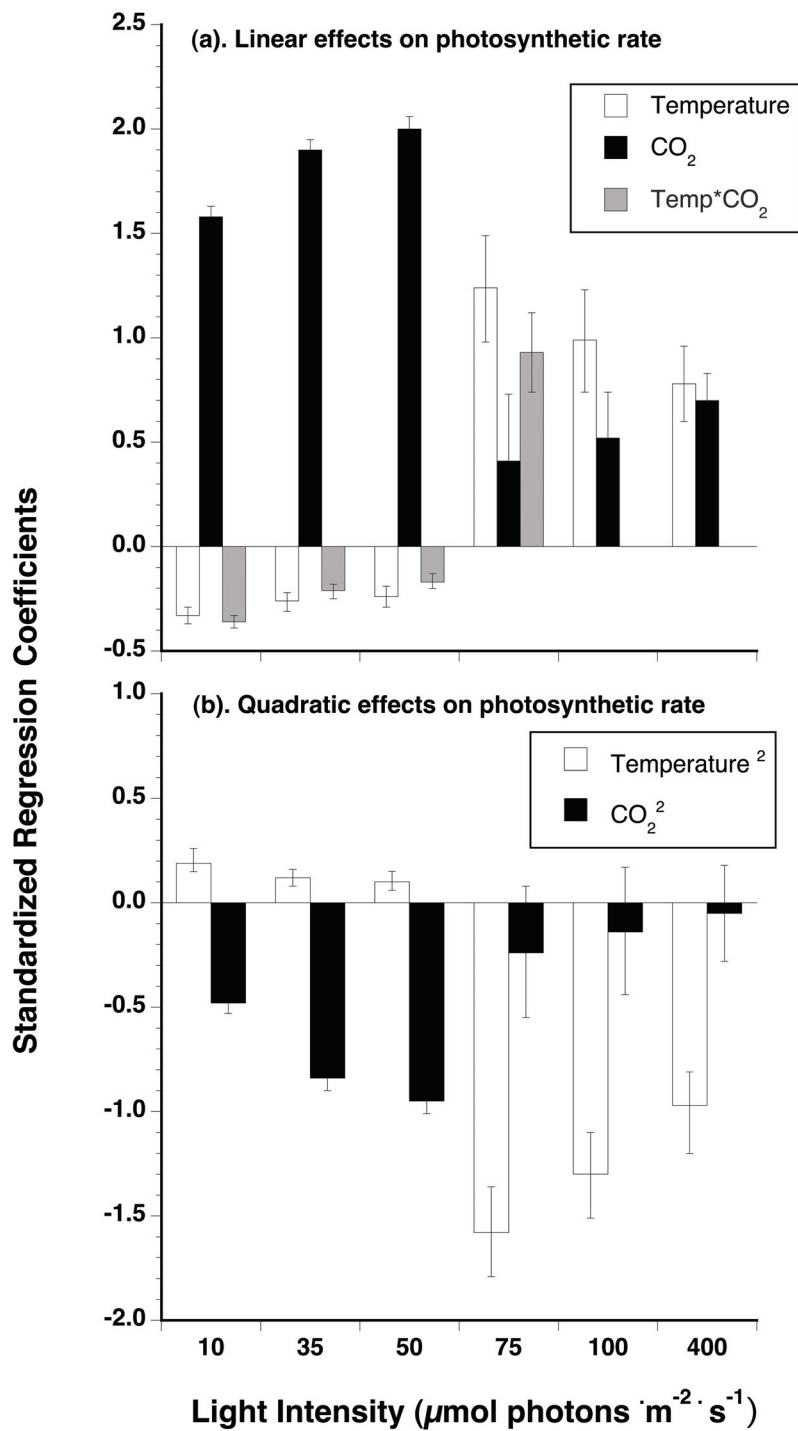

**Fig 2. Standardized partial regression coefficients  $\pm$  standard errors for (A) linear and (B) quadratic components of the best-fit regression model using AICc.** Coefficients for temperature (open columns),  $\text{CO}_2$  (filled columns), and the temperature\* $\text{CO}_2$  interaction (stippled columns) are plotted for each of six light intensities ranging from 10 to 400  $\mu\text{mol photons} \cdot \text{m}^{-2} \cdot \text{s}^{-1}$ .

doi:10.1371/journal.pone.0132806.g002



A similar magnitude of increased photosynthetic rate with increased  $p\text{CO}_2$  and temperature is expected under light saturation with two important differences (Fig 1C). Under light saturation, the effects of  $\text{CO}_2$  and temperature on photosynthetic rate are expected to be additive (i.e., no interaction between  $\text{CO}_2$  and temperature; Fig 2A). Also, modeled rates of photosynthesis of  $\text{CO}_2$ -using macroalgae at high light intensities are less sensitive to temperature at high  $p\text{CO}_2$  (i.e., negative quadratic coefficient of temperature approaches 0) than are algae near  $I_k$  (cf. Fig 1B and 1C). Overall under light saturation, the positive responses of photosynthetic rate to increasing  $\text{CO}_2$  or temperature are of equivalent magnitudes with respect to the linear component. The negative quadratic component for  $\text{CO}_2$  is small rendering a largely linear increase of photosynthetic rate to increasing  $\text{CO}_2$ , whereas the more negative quadratic coefficient of temperature causes a more curvilinear response (Figs 1C and 2B).

Fig 3 illustrates how different combinations of temperature and  $p\text{CO}_2$  in seawater at representative sub-saturating and saturating light intensities in which macroalgae are grown are predicted to affect  $Q_{10}$  responses. Estimated values of  $Q_{10}$  at sub-saturating light intensities vary little from  $\sim 0.9$  at all  $p\text{CO}_2$  and temperature levels simulated. In contrast, at light intensities approximating  $I_k$  or clearly saturating PFD,  $Q_{10}$  values exceed 1 at simulated temperatures  $\leq 20^\circ\text{C}$ , increase with increasing  $p\text{CO}_2$ , especially at  $10^\circ\text{C}$  in which  $Q_{10}$  estimates exceed 2. At 25 and  $30^\circ\text{C}$ ,  $Q_{10}$  values are approximately 0.9–1.0.

Rates simulated under different light,  $p\text{CO}_2$  and temperature regimes afford estimates of the percentage increase in photosynthesis relative to the recent past,  $p\text{CO}_2$  standard of 380 ppm. At all temperature and light intensities simulated, the greatest percentage increase of photosynthetic rates of up to 50% in response to increasing  $p\text{CO}_2$  is predicted to occur between 380 and 460 ppm  $\text{CO}_2$  (Fig 4). Thereafter, further increases in rates to 100% (i.e., doubling photosynthetic rate relative to 380 ppm) are predicted to occur at  $\sim 700$ – $800$  ppm  $p\text{CO}_2$  with algae at warmer temperatures and higher light intensities reaching this level of production at lower  $p\text{CO}_2$ .

All of the results presented in Figs 1–4 assume a minimal thickness of the diffusive pathlength through the boundary layer. Fig 5 shows the predicted effect on net photosynthetic rate of increased diffusive pathlength through the boundary layer for plants at different combinations of  $p\text{CO}_2$  and temperature at either saturating ( $400 \mu\text{mol photons} \cdot \text{m}^{-2} \cdot \text{s}^{-1}$ ), or subsaturating ( $35 \mu\text{mol photons} \cdot \text{m}^{-2} \cdot \text{s}^{-1}$ ) light intensity. Net photosynthetic rates are expected to decline sharply with a doubling of boundary layer from the thinnest pathlength (20 to  $40 \mu\text{m}$  length). Thereafter, declines in photosynthesis continue with increasing pathlength and, in fact, the relationship between net photosynthetic rate and boundary layer thickness across light intensities is described by a negative power law (see S1 Appendix). Two additional predictions are noteworthy with respect to ocean acidification and warming. First, as expected, the higher  $p\text{CO}_2$  concentrations in lower pH waters under ocean acidification partially compensates for greater DIC diffusion limitation associated with thicker boundary layers (S1 Appendix). Second, the effect of temperature, especially at, or above, saturating light intensities on photosynthetic rates predicted for minimal boundary layer thickness is progressively eliminated with increasingly thick boundary layers (Fig 5).

### Using discrimination against $^{13}\text{C}$ to indicate physiological response to added $p\text{CO}_2$

Discrimination against  $^{13}\text{C}$  by an alga ( $\Delta$ ) occurs with respect to the processes of diffusion of  $\text{CO}_2$  and carboxylation by RUBISCO differently fractionating  $^{13}\text{C}$ . The line in Fig 6 represents expected values of  $\Delta$  under well-mixed, minimal boundary layer conditions. Values of  $\Delta$  are predicted to be inversely related to light intensity (i.e., less discrimination with increasing light

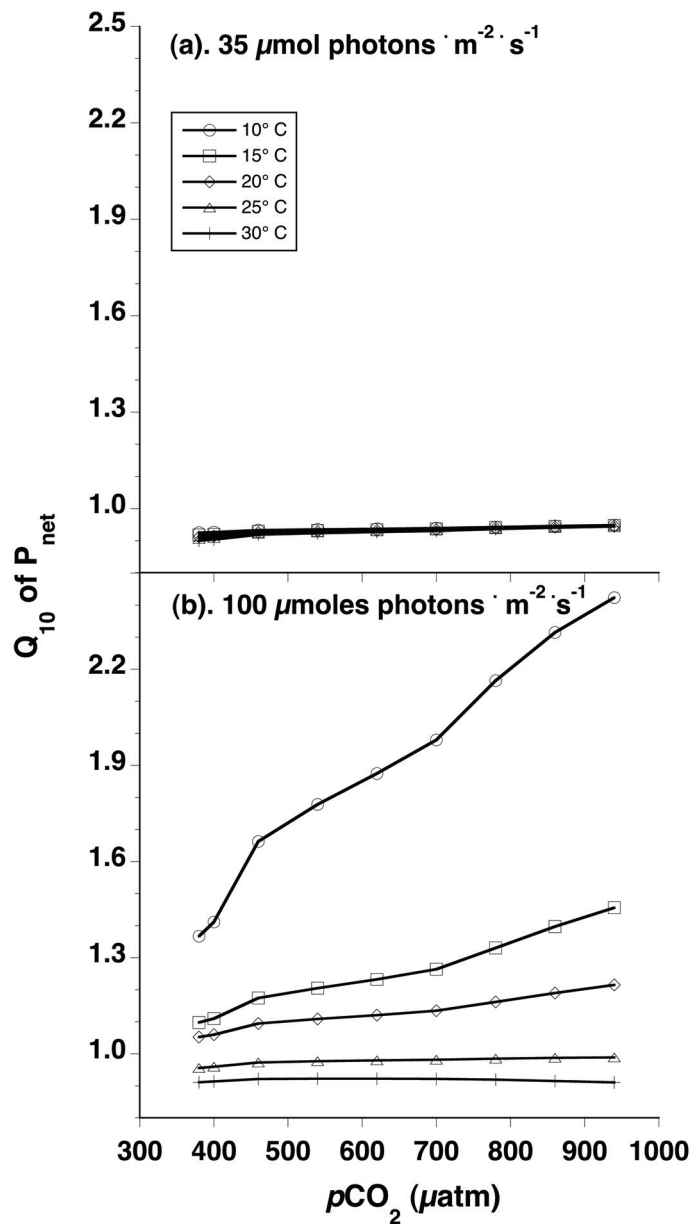

**Fig 3. Modeled  $Q_{10}$  response of net photosynthesis as a function  $pCO_2$  ( $\mu atm$ ) for seaweeds in seawater at 10° (circles), 15° (squares), 20° (diamonds), 25° (triangles), or 30°C (pluses) and representative sub-saturating ( $35 \mu mol photons \cdot m^{-2} \cdot s^{-1}$ , top plot), or saturating ( $100 \mu mol photons \cdot m^{-2} \cdot s^{-1}$ , bottom plot) photon flux densities.**

doi:10.1371/journal.pone.0132806.g003

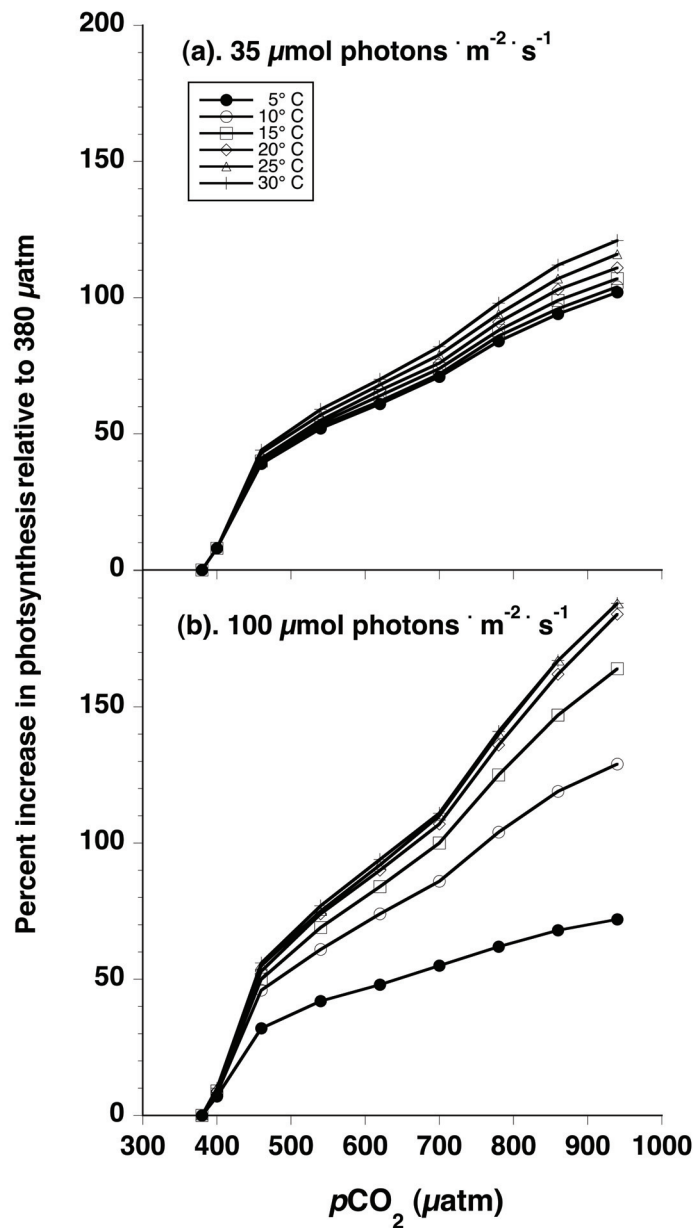

**Fig 4. Percentage increase in modeled rates of net photosynthesis, relative to rates at 380 μatm, as a function pCO<sub>2</sub> (μatm) for seaweeds in 5° (filled circles), 10° (open circles), 15° (squares), 20° (diamonds), 25° (triangles), or 30°C (pluses) seawater at representative sub-saturating (35 μmol photons · m<sup>-2</sup> · s<sup>-1</sup>, top plot), or saturating (100 μmol photons · m<sup>-2</sup> · s<sup>-1</sup>, bottom plot) light intensities.**

doi:10.1371/journal.pone.0132806.g004

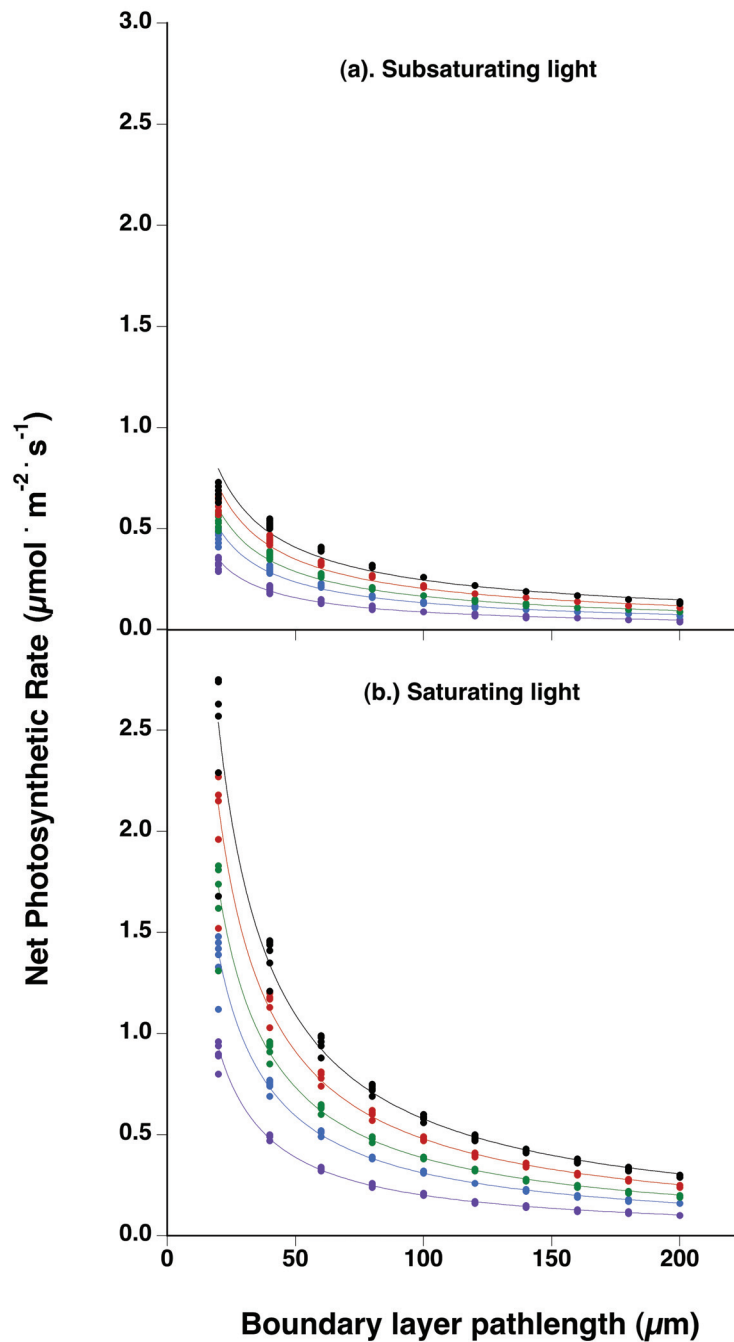

**Fig 5. Predicted rates of net photosynthesis as a function of pathlength through the diffusive boundary layer at the thallus surface for (a.) subsaturating light ( $35 \mu\text{mol photons} \cdot \text{m}^{-2} \cdot \text{s}^{-1}$ ), or (b.) saturating light ( $400 \mu\text{mol photons} \cdot \text{m}^{-2} \cdot \text{s}^{-1}$ ) intensities. Lines represent power curves fit to predicted points at each combination of temperature (5 to  $30^\circ\text{C}$  at  $5^\circ\text{C}$  intervals) and  $p\text{CO}_2$ ; purple, 380; blue, 460; green, 620; red, 780; black, 940  $\mu\text{atm}$ )**

doi:10.1371/journal.pone.0132806.g005

intensity; Fig 6). Additionally, as the thickness of the boundary layer increases, so too does the weight of fractionation against  $^{13}\text{C}$  due to diffusion. This causes a downward shift of the curve of  $\Delta$  versus light intensity (indicated by gray arrow in Fig 6). Thus, the line expressing the relationship between  $\Delta$  and light intensity represents the upper boundary (maximal) discrimination expected. Isotopic composition in tissues ( $\delta^{13}\text{C}$ ) is a function of both isotopic composition of the source seawater and overall fractionation of  $^{13}\text{C}$  by the alga. Corresponding expected  $\delta^{13}\text{C}$  values as a function of seawater temperature and  $\text{CO}_2$  as a fraction of total Carbon are shown in S1 Data.

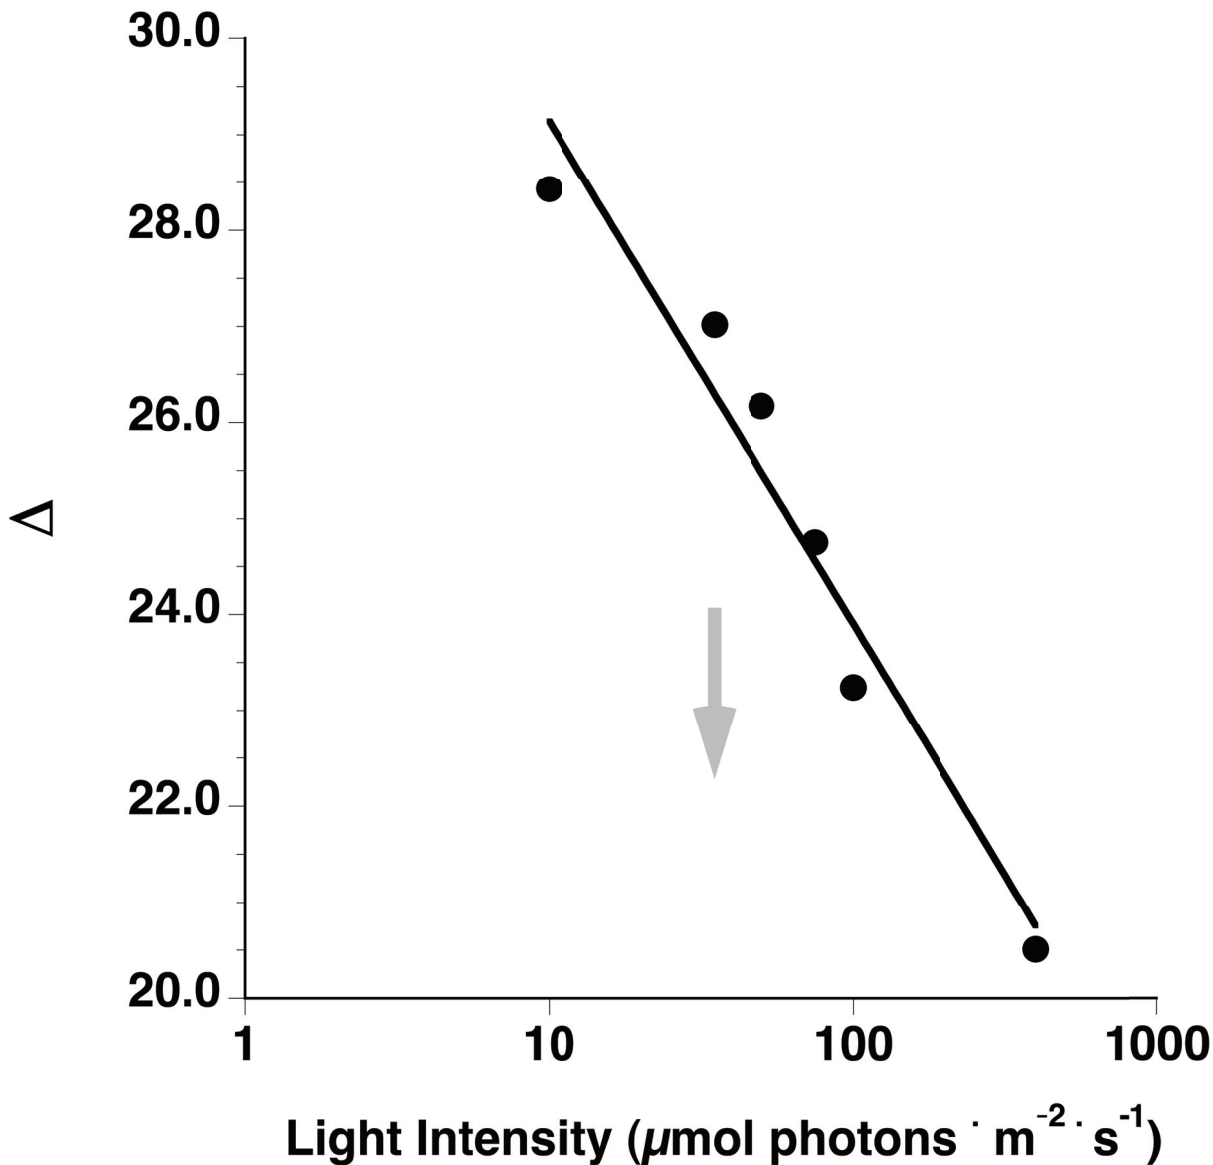

**Fig 6. Discrimination against  $^{13}\text{C}$  by a model  $\text{CO}_2$ -using red alga as a function of light intensity.** Solid line represents maximum discrimination expected at a given light intensity as a result of a minimal diffusive boundary layer. Increased diffusion path in a thicker boundary layer shifts the discrimination curve down (gray arrow). Note: X-axis scale is logarithmic.

doi:10.1371/journal.pone.0132806.g006

## Discussion

Concern about effects of climate change on marine life has spawned a rapidly increasing number of studies characterizing responses of algae to increasing CO<sub>2</sub> and temperature in the oceans. Few of those studies include evaluation of the mechanism of inorganic carbon acquisition operating as interface between the organism and the external carbonate chemistry. Haphazard choices of fleshy algal species as experimental subjects in some cases, or the special concern about calcareous algae in other cases, and the experimental conditions to which they are subjected make an emergent synthesis difficult. Our motivation was to develop a quantitative model to predict the effects of increased CO<sub>2</sub> on photosynthesis of strictly CO<sub>2</sub> using (i.e., non-bicarbonate using) red macroalgae, which are estimated to comprise ~35% of all rhodophytes [11] and are over represented among macroalgae communities in deepwater, low transparency water and caves [14]. A second model representing some bicarbonate-using species is in a forthcoming manuscript. We restricted our model to seawater salinities but it could be extended to include the strictly CO<sub>2</sub> using red algae in fresh water (e.g., *Lemanea spp.*; [42–44, 48]). The CO<sub>2</sub>-user model is based on the known temperature and pH-dependent fractionation of carbon species in seawater [35], dynamics of diffusive uptake of CO<sub>2</sub> in aquatic plants [25–27], and prior data on photosynthetic responses of CO<sub>2</sub>-using red seaweeds to temperature and light [12,15,16,18]. Such a model provides a tool to assess understanding of the relationships of photosynthesis to key environmental parameters, a valid framework upon which to base predictions of changes in primary production, distribution and abundance, and a basis from the bottom-up to inform hypotheses about community-level implications to climate change.

Analysis of these model outcomes generates predictions that address four fundamental, unresolved questions about productivity of CO<sub>2</sub>-using algae in a changing climate: (1) How much (if any) will productivity be enhanced in acidified coastal waters?, (2) Will increased CO<sub>2</sub> or temperature be the principal driver of changing algal productivity?, (3) Will changing CO<sub>2</sub> and temperature act synergistically to influence algal productivity?, (4) How will light supply affect (if at all) photosynthetic responses to increasing CO<sub>2</sub> and temperature?

### **pCO<sub>2</sub> has a stronger effect on photosynthetic rates at subsaturating photon flux densities while temperature had a larger effect on photosynthetic rates under higher light.**

The most striking result is the expectation that the individual and interactive effects of CO<sub>2</sub> and temperature on photosynthetic rates vary with light intensity. CO<sub>2</sub> has a stronger effect on photosynthetic rate at sub-saturating light intensities and temperature has a stronger effect at, or above, saturating light intensities. Standardized regression coefficients show that the magnitude of the CO<sub>2</sub> effect on photosynthetic rates is ≥5-fold the effect of temperature when photon flux density is limiting. In addition, under limiting PFD the effects of changing pCO<sub>2</sub> and temperature on photosynthetic rate are predicted to be antagonistic, which leads to a moderate negative interactive effect. At, and above, light saturation, temperature has a positive effect on net photosynthetic rates that is stronger than the positive effect of CO<sub>2</sub>. Whereas they act synergistically in the vicinity of I<sub>k</sub>, their effects on photosynthesis are additive well above I<sub>k</sub>. Further evidence of the light-dependent effects of temperature are suggested by Q<sub>10</sub> values at each pCO<sub>2</sub> under sub-saturating or saturating light intensities. The Q<sub>10</sub> of photosynthetic rate is approximately 1 at all pCO<sub>2</sub> levels and temperatures under sub-saturating light, but > 1 and increasing at higher pCO<sub>2</sub> levels from 10–20°C under saturating light.



OA is predicted to increase photosynthetic rate in algae using dissolved CO<sub>2</sub> as their inorganic carbon source. The magnitude of the benefit will be largest at warmer temperatures, greater photon flux densities, and high flow (thin boundary layer) conditions.

It is frequently suggested that non-calcifying algae will benefit from ocean acidification, but these suggestions are made without regard to the source of carbon a macroalga uses for photosynthesis, nor the magnitude of the presumed effect. In regard to the former, there is likely to be little direct benefit to bicarbonate-using seaweeds, which are typically saturated for DIC at present [28] and several empirical studies corroborate this (e.g., [49,50]; see also reviews by [6,7]), though there may be indirect benefits. As all algae use dissolved CO<sub>2</sub> for some fraction of their inorganic carbon supply, the predicted benefits may apply to that fraction of the net primary productivity in those species, as well. Based on our analysis, OA should benefit macroalgae that lack carbon-concentrating mechanisms. The magnitude of this benefit to enhanced productivity *in situ* appears to depend on both light supply and, especially, temperature in the environments inhabited by these algae. The predicted increases in photosynthetic rates are similar across all light environments simulated up to 460–500 μatm pCO<sub>2</sub>. The environmental range over which the greatest percentage (50%) benefit of OA is expected is from the current, approximate pCO<sub>2</sub> of 400 to 460 μatm. At higher pCO<sub>2</sub>, smaller proportionate increases in photosynthetic rate are predicted especially at lower PFD and temperature. At sub-saturating light intensities, a doubling of photosynthetic rate (relative to that measured at 380 ppm CO<sub>2</sub>) is predicted at ≥800 μatm pCO<sub>2</sub>. By contrast, algae living under saturating light should show a doubling of current photosynthetic rates at pCO<sub>2</sub>'s ranging from ~650, at temperatures ≥20°C, to ≥800 μatm at 5°C.

**Stimulation of photosynthesis by OA effects on diffusive CO<sub>2</sub> uptake are not predicted to be a large part of total coastal primary productivity.**

These large percentage increases in net photosynthetic rate, are not likely to cause large absolute changes in primary productivity. Maximum rates of net photosynthesis of red algae lacking CCMs are on the order of 1 μmol C-fixed · m<sup>-2</sup> · s<sup>-1</sup> at 380 μatm pCO<sub>2</sub>. For seaweeds living in habitats typically saturated with light, photosynthetic rates may be expected to reach 2 μmol C-fixed · m<sup>-2</sup> · s<sup>-1</sup> at pCO<sub>2</sub>'s greater than 700 μatm. For seaweeds living in light-limited habitats, photosynthetic rates may be expected to reach 0.75–1.0 μmol C-fixed · m<sup>-2</sup> · s<sup>-1</sup>. All marine photorophs supply some part of their inorganic carbon demand through the diffusive uptake of dissolved CO<sub>2</sub>. For most macroalgae, that is small fraction of their primary production. To the extent that additional dissolved CO<sub>2</sub> is increased there may be marginally great net photosynthetic rate if the CCM does not already completely saturate inorganic carbon supply.

**OA is unlikely to increase total productivity of algae lacking CCMs in their current habitats but may allow for range expansions into brighter habitats**

These predicted effects on photosynthesis in response to climate change have implications for the production, distribution and abundance of CO<sub>2</sub>-using rhodophytes and the communities in which they live. Rhodophytes lacking CCMs tend to live in temperate, low-light, cold water environments [13–16], precisely the kinds of conditions predicted to have little enhancement of productivity. Thus, the majority of CO<sub>2</sub>-using, non-calcifying macroalgae are expected have little potential to increase ecosystem-level production in their current, subtidal habitats.

We hypothesize that increased CO<sub>2</sub> may facilitate range expansion of CO<sub>2</sub>-using algae into new habitats. The potential increase in photosynthetic rate in bright, warmer environments due to alleviation of CO<sub>2</sub> limitation, predicted by the model, is consistent with this hypothesis. Nevertheless, increased production of CO<sub>2</sub>-using algae with continued rise of *p*CO<sub>2</sub> in seawater is not without constraint. Our estimates of  $\Delta$  predict an inverse relationship with light intensity, which is supported by empirical data from three rhodophyte species [30], but even under saturating light (e.g., 400  $\mu\text{mol C-fixed} \cdot \text{m}^{-2} \cdot \text{s}^{-1}$ ) discrimination values >20 are predicted. Discrimination against <sup>13</sup>C and isotopic composition values of CO<sub>2</sub>-using rhodophytes are greatly influenced by the relative weights of fractionation of <sup>13</sup>C due to diffusion of CO<sub>2</sub> through the boundary layer and carboxylation by RUBISCO [41]. Our model can accommodate a variable boundary layer thickness parameter, but model outputs of carbon stable isotope discrimination, presented here assume a minimal diffusive boundary layer thickness. Maberly et al. [15] showed that  $\Delta$  values of this magnitude (>20) from field-collected rhodophytes imply that discrimination by the organism is dominated by RUBISCO carboxylation, not CO<sub>2</sub> diffusion. Furthermore, [15] hypothesized that the inherently low maximum photosynthetic rates of CO<sub>2</sub>-using red algae may represent an adaptation to low light environments that ensures the capacity to fix carbon is commensurate with low rates of light absorption as a means to avoid photo-damage (see also [13]). Similar results showing more negative values of  $\delta^{13}\text{C}$  in other macroalgae grown at lower PFD indicate increased isotopic discrimination by RUBISCO [51]. These combined results suggest that geographic range expansions and increased production of CO<sub>2</sub>-using algae under OA may be constrained by a lack of adaptive capacity to exploit the added CO<sub>2</sub> in seawater. This interpretation is further supported by the model result that CO<sub>2</sub> had a stronger effect on net photosynthetic rate under light-limited, compared to light saturated, conditions.

### Model outcomes predict the largest climate change effects on macroalgae will be during warming summers and in shallow, well mixed waters

It has been observed that increasing temperature and increasing *p*CO<sub>2</sub> can have competing effects on the growth and photosynthetic rates of seagrasses (R. Zimmerman, pers. comm.). In a red macroalga with a CCM, high *p*CO<sub>2</sub> increased the photosynthetic rate at low temperature [22]. Our model predicts that effect for seaweeds without CCMs, but the effect at saturating PFD is much stronger than at limiting PFD. There is a complex interrelationship between the multiple stressors of photosynthetic rate. Predicting the consequences of climate change on productivity requires knowledge of the light environment as well as the pH and temperature, with the greatest effects at high temperatures, and saturating light intensities. While some terrestrial organisms are strongly affected by warming winters (e.g., [52]), our results suggest that the largest effects on macroalgae will be during warming summers and in shallow habitats.

The stressors of photosynthetic rate, examined here, are likely to affect other aspects of algal physiology that contribute to growth and survival under climate change. Thermal effects on rates of photorespiration, respiration in the light were not modeled here. The model includes thermal effects on respiration inherent in the net photosynthetic rate versus temperature relationships used to parameterize the model. However, extrapolation from this model to growth rates would require greater knowledge of the temperature and boundary layer sensitivity of many additional uptake and metabolic processes.

The model presented here serves as a framework upon which principal variables associated with climate change (*p*CO<sub>2</sub> in, and temperature of, seawater), can be evaluated with respect to their effects on the productivity of phototrophs that depend on diffusive uptake, only, of CO<sub>2</sub>

for photosynthesis. As data accumulate from studies targeting CO<sub>2</sub>-users, comparisons can be made with predictions from the model about the relative importance and magnitudes of effect of these variables on primary production. Based on our understanding of the physiological responses of this group of phototrophs to multiple environmental stressors, we predict that climate change will increase their productivity slightly in the near future and may facilitate range expansions. An accurate understanding is crucial to inform community and ecosystem-level models that seek to predict the extent to which bottom-up effects on production due to changed conditions and resource availabilities will matter ecologically.

## Supporting Information

### S1 Appendix. Analysis of Diffusion Pathlength Effects.

(DOCX)

### S2 Appendix. Multimodel Inference Method.

(DOCX)

### S1 Data. Predicted values of isotopic composition of plants as a function of seawater temperature and CO<sub>2</sub> as a fraction of total Carbon.

(XLSX)

### S1 Table. Summary of data sources used for model parameterization.

(DOCX)

## Acknowledgments

This work was inspired by and is dedicated to J.A. Raven.

## Author Contributions

Conceived and designed the experiments: JEK SRD. Performed the experiments: JEK SRD. Analyzed the data: JEK SRD. Contributed reagents/materials/analysis tools: JEK SRD. Wrote the paper: JEK SRD.

## References

1. Raven J, Caldeira K, Elderfield H, Hoegh-Goldberg O, Liss P, Riebesell U. et al. Ocean acidification due to increasing atmospheric carbon dioxide. 2005: Policy Document. The Royal Society, London.
2. Morel F, Archer D, Barry JP, Brewer GD, Corredor JE, Doney SC et al. A National Strategy to Meet the Challenges of a Changing Ocean. National Research Council Committee on the Development of an Integrated Science Strategy for Ocean Acidification Monitoring, Research, and Impacts Assessment. Ocean Acidification. National Academies Press; 2010 ISBN: 0-309-15360-3.
3. Kleypas JA, Buddemeier R, Archer D, Gattuso J, Langdon C, Opdyke B Geochemical consequences of increased atmospheric carbon dioxide on coral reefs. *Science* 1999; 284: 118–120. PMID: [10102806](https://pubmed.ncbi.nlm.nih.gov/10102806/)
4. Raven JA, Ball LA, Beardall J, Giordano M, Maberly S.C. Algae lacking carbon-concentrating mechanisms *Can. J. Bot.* 2005; 83: 879–890.
5. Comeau S, Carpenter RC, Edmunds PJ. Coral reef calcifiers buffer their response to ocean acidification using both bicarbonate and carbonate. *Philos Trans R Soc Lond B Biol Sci.* 2013; 280: 20122374.
6. Kroeker KJ, Kordas RL, Crim R, Hendriks I, Ramajo L, Singh G. et al. Impacts of ocean acidification on marine organisms: quantifying sensitivities and interaction with warming. *Glob Chang Biol* 2013; 19(6): 1884–1896. doi: [10.1111/gcb.12179](https://doi.org/10.1111/gcb.12179) PMID: [23505245](https://pubmed.ncbi.nlm.nih.gov/23505245/)
7. Kroeker KJ, Kordas RL, Crim RN, Singh GG Meta-analysis reveals negative yet variable effects of ocean acidification on marine organisms. *Ecol Lett* 2010; 11:1304–1315.

8. Cornwall CE, Boyd P, McGraw C, Hepburn C, Pilditch C, Morris J et al. Diffusion boundary layers ameliorate the negative effects of ocean acidification on the temperate coralline macroalga *Arthrocardia corymbosa*. PLoS One 2014; 9, e97235. doi: [10.1371/journal.pone.0097235](https://doi.org/10.1371/journal.pone.0097235) PMID: [24824089](https://pubmed.ncbi.nlm.nih.gov/24824089/)
9. Sett S, Bach LT, Schulz KG, Koch-Klavnsen S, Lebrato M, Riebesell U. Temperature Modulates Coccolithophorid Sensitivity of Growth, Photosynthesis and Calcification to Increasing Seawater pCO<sub>2</sub>. PLoS ONE 2014; 9(2): e88308. doi: [10.1371/journal.pone.0088308](https://doi.org/10.1371/journal.pone.0088308) PMID: [24505472](https://pubmed.ncbi.nlm.nih.gov/24505472/)
10. Hendriks IE, Duarte CM, Alvarez M Vulnerability of marine biodiversity to ocean acidification: a meta-analysis. Estuar Coast Shelf Sci 2010; 86: 157–164.
11. Raven JA, Johnston AM, Kübler JE et al. Mechanistic interpretation of carbon isotope discrimination by marine macroalgae and seagrasses. Funct Plant Biol 2002; 29: 525–536.
12. Johnston AM, Maberly SC, Raven JA, Korb R, McInroy SG, Handley LL et al. The acquisition of inorganic carbon by four red macroalgae from different habitats. Oecologia, 1992; 92: 317–326.
13. Raven JA, Johnston AM, Kübler JE, Korb R, McInroy SG, Handley LL et al. Seaweeds in cold seas: evolution and carbon acquisition. Ann Bot 2002; 90: 525–536. PMID: [12324277](https://pubmed.ncbi.nlm.nih.gov/12324277/)
14. Cornwall C, Revill AT, Hurd CL High prevalence of diffusive uptake of CO<sub>2</sub> by macroalgae in a temperate subtidal ecosystem Photosyn. Res. 2015; 124, (2): 181–190. doi: [10.1007/s11120-015-0114-0](https://doi.org/10.1007/s11120-015-0114-0)
15. Maberly SC, Johnston AM, Raven JA Discrimination between <sup>12</sup>C and <sup>13</sup>C by marine plants. Oecologia, 1992; 91: 481–491.
16. Kübler JE, Johnston AM, Raven JA The effects of reduced and elevated CO<sub>2</sub> and O<sub>2</sub> on the seaweed, *Lomentaria articulata*. Plant Cell and Environ. 1999; 22: 1303–1310.
17. Davison IR Environmental effects on algal photosynthesis: Temperature. J Phycol 1991; 27: 2–8.
18. Kuebler JE, Davison IR, Yarish C Photosynthetic temperature adaptation in the red algae, *Lomentaria baileyana* and *Lomentaria orcadensis*. Br Phyc J 1991; 26: 9–19.
19. Kübler JE, Davison IR High-temperature tolerance of photosynthesis in the red alga, *Chondrus crispus*. Mar Biol 1993; 117: 327–336.
20. Kübler JE, Davison IR Thermal acclimation of light-use characteristics of *Chondrus crispus* (Rhodophyta). Euro J Phycol 1995; 30: 189–195.
21. Sarker MY, Bartsch I, Olischlager M, Gutow L, Weincke C. Combined effects of CO<sub>2</sub>, temperature, irradiance and time on the physiological performance of *Chondrus crispus* (Rhodophyta). Bot Marin 2013; 56(1): 63–74 doi: [10.1515/bot-2012-0143](https://doi.org/10.1515/bot-2012-0143)
22. Olischlager M, Wiencke C. Ocean Acidification alleviates low-temperature effects on growth and photosynthesis of the red alga *Neosiphonia harveyi* (Rhodophyta). J Exp Bot 2013; 64: 5587–5597. doi: [10.1093/jxb/ert329](https://doi.org/10.1093/jxb/ert329) PMID: [24127518](https://pubmed.ncbi.nlm.nih.gov/24127518/)
23. Kübler JE, Raven JA The interaction of inorganic carbon acquisition with light supply to *Palmaria palmata* (Rhodophyta). J Phycol 1995; 31: 369–375.
24. Kübler JE, Raven JA Carbon acquisition by red seaweeds grown under dynamic light regimes. Hydrobiol 1996; 326/327: 401–406.
25. Hill R, Whittingham CP Photosynthesis. Methuen, London, U.K. 1955.
26. Johnston AM, Raven JA Dark carbon fixation studies on the intertidal macroalga *Ascophyllum nodosum* (Phaeophyta). J Phycol 1986; 22: 78–83.
27. Milhouse J, Strother S Salt-stimulated bicarbonate-dependent photosynthesis in the marine angiosperm *Zostera mulleri*. J Exp Bot 1986; 37: 965–976.
28. Falkowski PG, Raven JA Aquatic Photosynthesis. Second Edition. Princeton University Press, 2007.
29. Hurd CL, Harrison PJ, Bischof K, Lobban CS Seaweed Ecology and Physiology. 2nd Edition. Cambridge University Press, 2014.
30. Kübler JE, Raven JA Consequences of light-limitation for carbon acquisition in three rhodophytes. Mar Ecol Prog Ser 1994; 110: 203–209.
31. Brechignac F, Andre M Oxygen uptake and photosynthesis of the red macroalga, *Chondrus crispus*, in seawater: Effects of light and CO<sub>2</sub> [carbon dioxide] concentration. Plant Physiol 1984; 75: 919–923. PMID: [16663760](https://pubmed.ncbi.nlm.nih.gov/16663760/)
32. Brechignac F, Andre M Oxygen uptake and photosynthesis of the red macroalga, *Chondrus crispus*, in seawater. Effects of oxygen concentration. Plant Physiol 1985; 78: 545–550. PMID: [16664280](https://pubmed.ncbi.nlm.nih.gov/16664280/)
33. Uemura K, Anwaruzzaman, Miyachi S, Yokota A Ribulose-1,5-Bisphosphate Carboxylase/Oxygenase from thermophilic red algae with a strong specificity for CO<sub>2</sub> fixation. Biochem Biophys Res Commun 1997; 233: 568–571. PMID: [9144578](https://pubmed.ncbi.nlm.nih.gov/9144578/)

34. Badger MR, Andrews TJ, Whitney SM, Ludwig M, Yellowlees DC, Leggat W et al. The diversity and coevolution of RUBISCO, plastids, pyrenoids, and chloroplast-based CO<sub>2</sub>-concentrating mechanisms in algae. *Can J Bot* 1998; 76: 1052–1071.
35. Sherlock JA, Raven JA Interactions between carbon dioxide and oxygen in the photosynthesis of three species of marine red algae. *Bot J Scotland* 2001; 113: 301–307.
36. Robbins LL, Hansen ME, Kleypas JA, Meylan SC CO<sub>2</sub> calc: A user-friendly seawater carbon calculator for Windows, Mac OS X, and iOS (iPhone). U.S. Geological Survey Open File Report 2010–1280, 2010.
37. Zeebe R On the molecular diffusion coefficients of dissolved CO<sub>2</sub>, HCO<sub>3</sub><sup>-</sup> and CO<sub>2</sub>-3 and their dependence on isotopic mass. *Geochim Cosmochim Acta* 2011; 75: 2483–2498.
38. Lueker TJ, Dickson AG, Keeling CD. Ocean pCO<sub>2</sub> calculated from dissolved inorganic carbon, alkalinity and equations for K<sub>1</sub> and K<sub>2</sub>: Validation based on laboratory measurements of CO<sub>2</sub> in gas and seawater at equilibrium. *Mar Chem* 2000; 70: 105–119.
39. Dickson AG, Sabine CL, Christian JR. Carbon dioxide Analytical Handbook. 2007.
40. Mook WG, Bommerson JC, Staverman WH. Carbon isotope fractionation between dissolved bicarbonate and gaseous carbon dioxide. *Earth Planet Sci Lett* 1974; 22: 169–176.
41. Raven JA. Inorganic carbon acquisition by marine autotrophs. *Adv Bot Res* 1997; 27: 85–209
42. MacFarlane JJ, Raven JA. External and internal CO<sub>2</sub> transport in *Lemanea*: interactions with the kinetics of ribulose biphosphate carboxylase. *J Exp Bot* 1985; 36: 610–622.
43. MacFarlane JJ, Raven JA. Quantitative determination of the unstirred layer permeability and kinetic parameters of RUBISCO in *Lemanea mamillosa*. *J Exp Bot* 1989; 40: 321–327.
44. MacFarlane JJ, Raven JA. C, N, and P nutrition of *Lemanea mamillosa* Kützinger (Batrachospermales, Rhodophyta) in the Dighty Burn, Angus, Scotland. *Plant Cell Environ* 1990; 13: 1–13.
45. Mazerolle MJ. Model selection and multimodel inference based on (Q)AIC(c). R Package, Version 1.35 2013.
46. R Core Development Team. R; A Language and Environment for Statistical Computing. R Foundation for Statistical Computing, Vienna, Austria. ISBN 3-900051-07-0, URL <http://www.R-project.org/>, 2013.
47. Burnham KP, Anderson DR Model Selection and Multi-Model Inference: A Practical Information-Theoretic Approach. Second edition. Springer, New York. 2002 488 pp.
48. Raven JA, Macfarlane JJ, Griffiths H. The application of carbon isotope discrimination techniques. In: Crawford R.M.M. (ed). *Plant Life in Aquatic and Amphibious Habitats*. Blackwell, 1987.
49. Gordillo FJL, Neill FX, Figueroa FL. Nonphotosynthetic enhancement of growth by high CO<sub>2</sub> level in the nitrophilic seaweed *Ulva rigida* C. Agardh (Chlorophyta) *Planta* 2001; 213: 64–70. PMID: [11523657](https://pubmed.ncbi.nlm.nih.gov/11523657/)
50. Gordillo FJL, Figueroa FL, Neill FX. Photon- and carbon-use efficiency in *Ulva rigida* at different CO<sub>2</sub> and N levels. *Planta* 2003; 218:315–322. PMID: [12937985](https://pubmed.ncbi.nlm.nih.gov/12937985/)
51. Wiencke C, Fischer G Growth and stable carbon isotope composition of cold-water macroalgae in relation to light and temperature. *Mar Ecol Prog Ser* 1990; 65: 283–292.
52. Post E, Stenseth O. Climatic variability, plant phenology and northern ungulates. *Ecol* 1999; 80: 1322–1339.
